# Supplementary material
Source: PubMed Central journal article supplement (PMC3565753)

Fig. S1

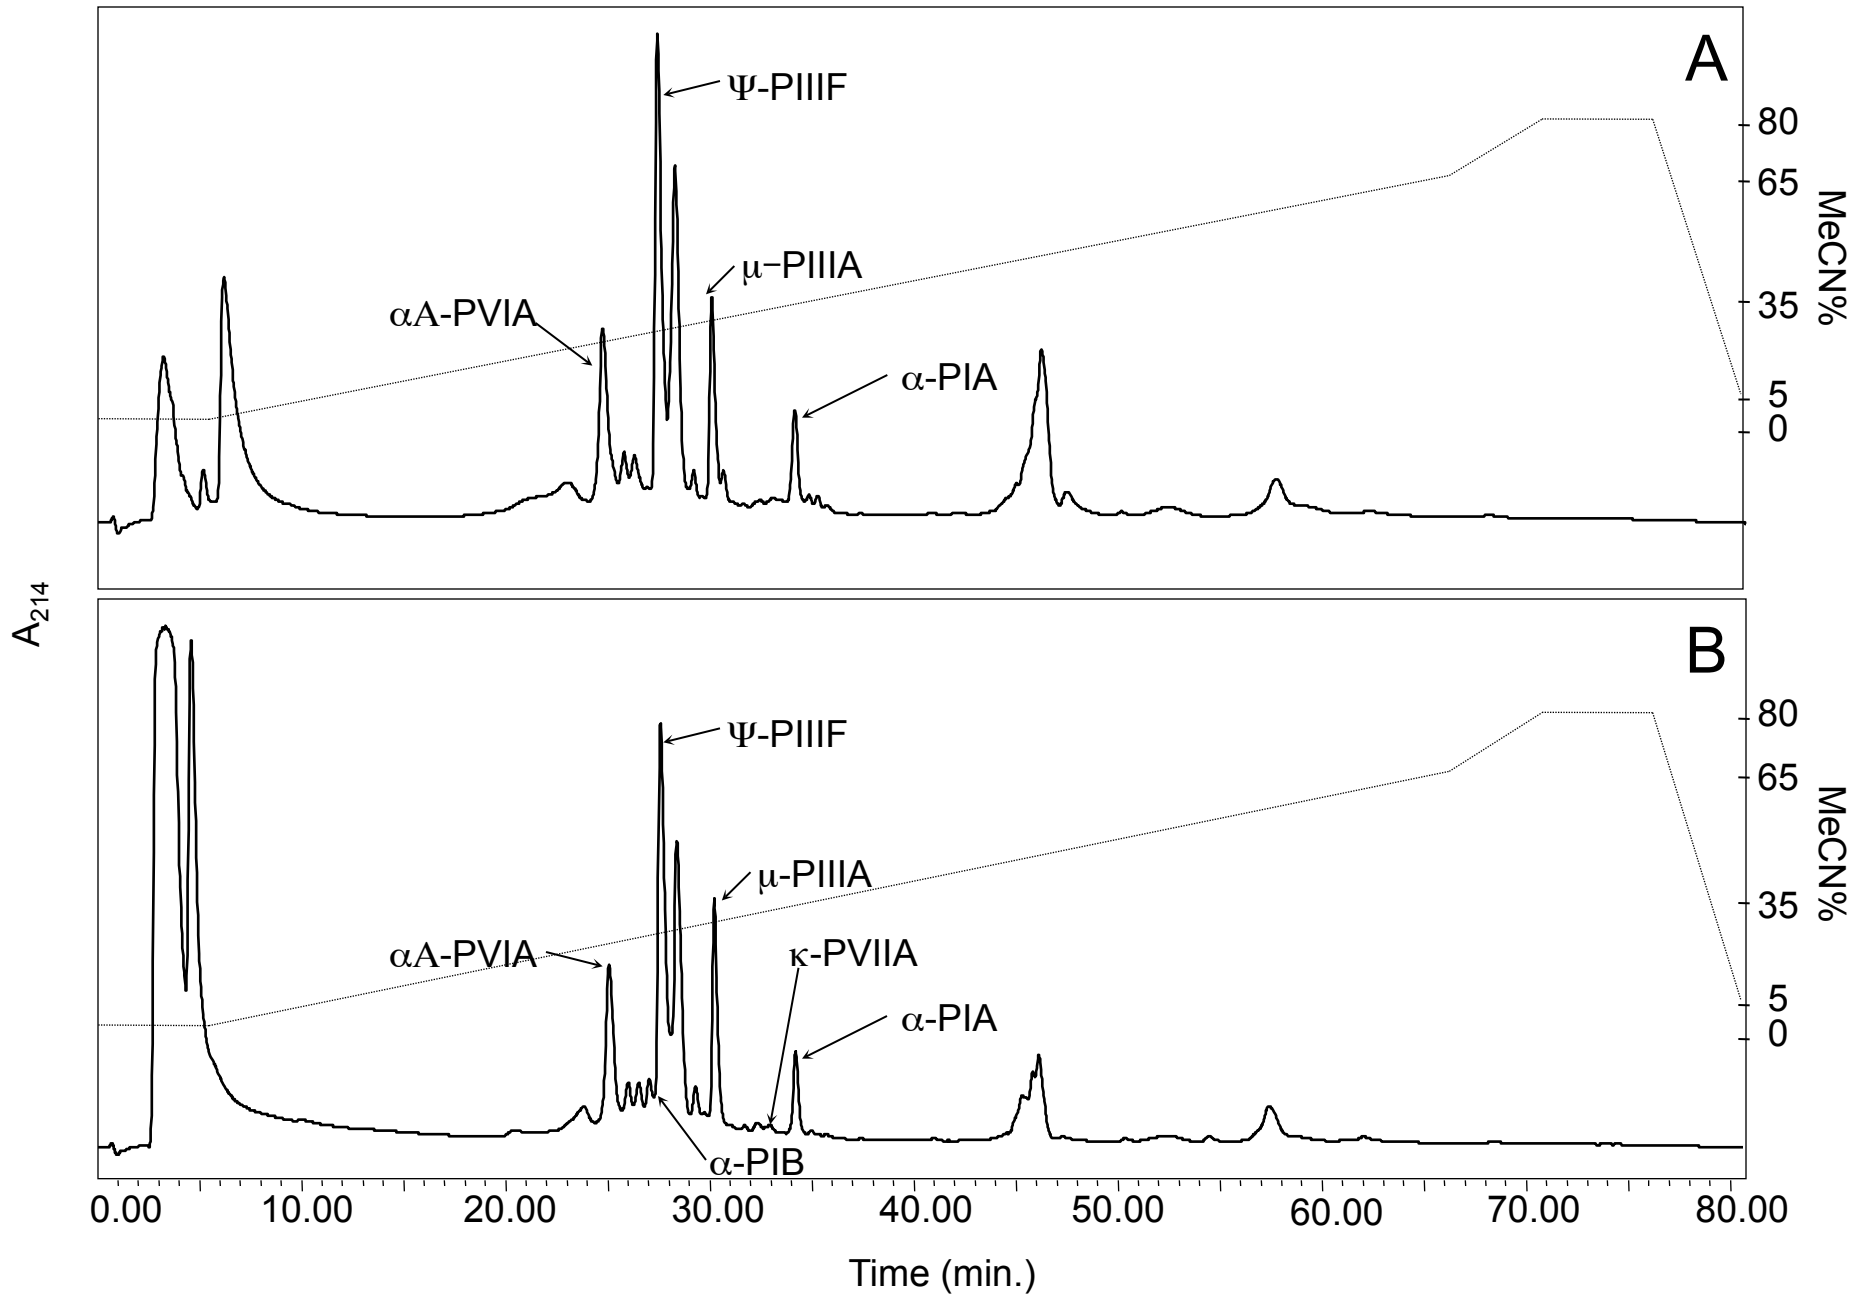

Supplement: NIHMS434430-supplement-FigS1.pdf [file NIHMS434430-supplement-FigS1.pdf]
